1 **H3K27me3 is a determinant of chemotolerance**  
2 **in triple-negative breast cancer**

3  
4 Justine Marsolier<sup>1,2</sup>, Pacôme Prompsy<sup>1,2</sup>, Adeline Durand<sup>1,2#</sup>, Anne-Marie Lyne<sup>3#</sup>, Camille Landragin<sup>1,2</sup>,  
5 Amandine Trouchet<sup>1,2</sup>, Sabrina Tenreira Bento<sup>3</sup>, Almut Eisele<sup>3</sup>, Sophie Foulon<sup>4</sup>, Léa Baudre<sup>1,2</sup>, Kevin  
6 Grosselin<sup>4,5,‡</sup>, Mylène Bohec<sup>6</sup>, Sylvain Baulande<sup>6</sup>, Ahmed Dahmani<sup>2</sup>, Laura Sourd<sup>2</sup>, Eric Letouzé<sup>7</sup>,  
7 Elisabetta Marangoni<sup>2</sup>, Leïla Perié<sup>3\*</sup>, Céline Vallot<sup>1,2\*</sup>

8

9 Affiliations:

10 1 CNRS UMR3244, Institut Curie, PSL University, Paris, France

11 2 Translational Research Department, Institut Curie, PSL University, Paris, France

12 3 CNRS UMR168, Institut Curie, PSL University, Sorbonne University, Paris, France

13 4 CNRS UMR8231, ESPCI Paris, PSL University, Paris, France

14 5 HiFiBio SAS, Paris, France

15 6 Genomics of Excellence (ICGex) Platform, Institut Curie, PSL University, Paris, France

16 7 Functional Genomics of Solid Tumors laboratory, Centre de Recherche des Cordeliers, Sorbonne  
17 University, Inserm, USPC, Paris Descartes University, Paris Diderot University, Paris, France

18 # These authors contributed equally to this work.

19 ‡ Current Affiliation: Broad Institute of MIT and Harvard, Cambridge MA, USA

20

21 \*co-last authors

22 correspondence to [celine.vallot@curie.fr](mailto:celine.vallot@curie.fr)

23 **Summary**

24

25 **Triple-negative breast cancer is associated with the worst prognosis and the highest risk of**  
26 **recurrence among all breast cancer subtypes<sup>1</sup>. Residual disease, formed by cancer cells persistent to**  
27 **chemotherapy, remains one of the major clinical challenges towards full cure<sup>2,3</sup>. There is now**  
28 **consensus that non-genetic processes contribute to chemoresistance in various tumor types,**  
29 **notably through the initial emergence of a reversible chemotolerant state<sup>4-6</sup>. Understanding non-**  
30 **genetic tumor evolution stands now as a prerequisite for the design of relevant combinatorial**  
31 **approaches to delay recurrence. Here we show that the repressive histone mark H3K27me3 is a**  
32 **determinant of cell fate under chemotherapy exposure, monitoring epigenomes, transcriptomes**  
33 **and lineage with single-cell resolution. We identify a reservoir of persisters basal cells with EMT**  
34 **markers and activated TGF- $\beta$  pathway leading to multiple chemoresistance phenotypes. We**  
35 **demonstrate that, in unchallenged cells, H3K27 methylation is a lock to the expression program of**  
36 **persister cells. Promoters are primed with both H3K4me3 and H3K27me3, and removing H3K27me3**  
37 **is sufficient for their transcriptional activation. Leveraging lineage barcoding, we show that**  
38 **depleting H3K27me3 alters tumor cell fate under chemotherapy insult - a wider variety of tumor**  
39 **cells tolerate chemotherapy. Our results highlight how chromatin landscapes shape the potential of**  
40 **unchallenged cancer cells to respond to therapeutic stress.**

41 **Text**

42 Emergence of resistance phenotypes from initially responding or partially-responding tumors has been  
43 modeled as a multi-step process in cancer<sup>7</sup>. Initially, post drug insult, only a pool of persister cells - also  
44 called drug-tolerant persister cells (DTPs) - manage to tolerate the cancer treatment and survive<sup>8</sup>.  
45 These cells constitute a reservoir of cells from which drug-resistant cells, actively growing under cancer  
46 treatment, will ultimately emerge<sup>8-10</sup>. In triple-negative breast cancer (TNBC), both genetic and  
47 transcriptomic mechanisms have been proposed to drive cancer evolution towards chemoresistance,  
48 through combined selective and adaptive modes of evolution<sup>11</sup>. The recent identification of a multi-  
49 clonal reversible drug-tolerant state post neo-adjuvant chemotherapy in patient-derived xenografts  
50 (PDX)<sup>6</sup> suggested that the earliest steps of chemoresistance in TNBC are not driven by genetic  
51 alterations, but rather by non-genetic plasticity in multiple cancer cells. Similarly, in other cancer types,  
52 persister states have been identified solely by changes in transcriptomic and epigenomic features in  
53 response to targeted therapies or chemotherapies<sup>12-15</sup>.

54 Genetic history of many cancer types has been extensively modelled thanks to both bulk and single-  
55 cell approaches<sup>11,16</sup>. In contrast, little is known about the epigenomic heterogeneity and dynamics of  
56 acquisition of epigenetic alterations. While recent studies have focused on the evolution of DNA  
57 methylation<sup>17,18</sup>- among the most stable epigenetic locks to gene expression, contribution to tumor  
58 evolution of more versatile epigenetic modifications, has remained poorly understood. Single-cell  
59 methods to map repressive and permissive histone modifications, key players of cellular plasticity,  
60 have emerged only recently<sup>19,20</sup>, enabling the study of epigenomic diversity within biological systems.  
61 Here, combining single-cell transcriptomics and epigenomics with lineage barcoding, we show that the  
62 distribution of H3K27me3 – trimethylation at lysine 27 of histone H3 - is a key determinant of cell fate  
63 upon chemotherapy exposure in TNBC, shaping expression programs and cell potential to tolerate  
64 chemotherapy.

65 Resistance to adjuvant chemotherapy for TNBC patients, post-surgery, cannot be easily studied as  
66 biopsies are not routinely performed when the disease progresses. To circumvent these limitations,

67 we modelled, *in vivo* and *in vitro*, phenotypes of drug-response observed in patients. *In vivo*, we  
68 treated a patient-derived xenograft (PDX) model, established from a patient with residual TNBC<sup>19,21</sup>,  
69 with Capecitabine, the standard of care for residual breast tumors. After the first round of  
70 chemotherapy treatment, mice displayed a pathological complete response (pCR), but tumors  
71 eventually recurred ('recurrent') and mice were treated again with chemotherapy, to which tumors  
72 responded to various extents ('responder' or 'resistant') (Fig. 1a and Extended Fig. 1a-c). These  
73 recurrent tumors potentially arose from persister cells, surviving initial chemotherapy treatment<sup>9</sup>. We  
74 isolated 'persister' cells by pooling the fat pad from 6 mice with pCR (Extended Fig. 1d-f). We also  
75 generated '*residual*' tumors (n=2) to phenocopy a clinical situation of partial response (Fig. 1a and  
76 Extended Fig. 1a and 1d) by administering a moderate dose of Capecitabine (270 mg/kg, half the usual  
77 dose).

78 *In vitro*, we treated an initially chemosensitive TNBC cell line (MDA-MB-468), with the pro-drug of  
79 Capecitabine, Fluorouracil (5-FU)<sup>22</sup>, as Capecitabine is not metabolized *in vitro*. We drove  
80 independently three pools of cells to chemoresistance with prolonged 5-FU treatment (>15 weeks).  
81 After 3 weeks, only few cells survived drug insult (0.01% of the initial population) and started  
82 proliferating again under chemotherapy after 10-15 days (Fig. 1b and Extended Fig. 2a-b). Over 15  
83 weeks, populations of resistant cells emerged, with an IC50 to 5-FU over 4-fold higher than  
84 chemonaive population and doubling times comparable to chemonaive cells (Extended Fig. 2c).

85 To characterize transcriptomic evolution of chemonaive cells towards chemotolerance and  
86 subsequently chemoresistance, we performed single-cell RNA-seq (scRNA-seq) in both cell lines and  
87 PDX models (Fig. 1c-d, Extended Fig. 1g-i, 2d-f). *In vivo*, scRNA-seq was mandatory to identify the rare  
88 human persister cells among the vast majority of stromal mouse cells. Out of the fat pad, we isolated  
89 n~3,480 persister cells, an average of 580 cells per mouse. Both *in vivo* and *in vitro* models, diverse cell  
90 populations, with distinct expression programs (Fig.1c-d), originated from the pool of persister cells,  
91 which recurrently activated the same set of pathways compared to chemonaive cells (Fig. 1c-e,  
92 Extended Fig. 1g-i, Extended Fig. 2d-g). Originating from *KRT5*-expressing cancer cells, persister cells

93 recurrently activated sets of genes further establishing basal cell identity (Extended Fig. 1h-j), such as  
94 *KRT14* (Fig. 1c-d). In addition, persister cells showed an activation of the TGF- $\beta$  pathway with the  
95 expression of multiple players including ligands and receptors: *in vivo* - *TGFB2*, *INHBA*, *INHBB*, *TGFB2R*  
96 *and TGFB3R* (Fig.1c, Extended Fig.1h-i) - and *in vitro* - *TGFB1*, *INHBA* and *TGFBR1* (Figure 1d, Extended  
97 Fig. 2f). Compared to chemo-naïve cells, persister cells also showed an activation of genes associated  
98 to the Epithelial-to-Mesenchymal Transition (EMT, Fig.1c-d, Extended Fig. 1h-i, 2e-f), such as *FOXQ1*,  
99 a transcription factor previously identified to drive EMT<sup>23,24</sup> in cancer, and *NNMT*, characteristic of the  
100 metabolic changes that accompany EMT<sup>25-27</sup>. TGF- $\beta$  and EMT associated-genes have been shown as  
101 markers of residual TNBC<sup>28,29</sup> and were proposed as potential drivers of chemoresistance in lung<sup>30</sup>,  
102 pancreatic<sup>31</sup>, breast<sup>32</sup>, and colorectal cancers<sup>33,34</sup>. *In vivo*, we showed that persister and residual tumor  
103 cells actually clustered together (cluster C1) and shared a common expression program, suggesting  
104 similar mechanisms of chemotolerance independent of the residual burden (Extended Fig. 1g). Yet  
105 persister cells displayed a decreased proliferation rate as attested by a higher number of cells in G0/G1  
106 (Extended Fig. 1f and Extended Fig. 2b), in line with previous reports<sup>12,14,35</sup>. *In vitro*, we identified two  
107 clusters of persister cells (clusters C2 and C4), that differ by their expression of additional EMT markers  
108 such as *CDH2* (Fig. 1d) and *TWIST1*. Early individual persisters (day 33) solely belonged to cluster  
109 C2/CDH2- whereas growing persisters could either belong to C2/CDH2- or C4/CDH2+ (Fig.1d and  
110 Extended Fig. 2d). Overall, we identified both *in vivo* and *in vitro* a reservoir of persister basal cells with  
111 EMT markers and activated TGF- $\beta$  pathway evolving to multiple resistant phenotypes (Fig. 1c-d). We  
112 pinpoint TGF- $\beta$  and EMT pathway activation as the earliest common molecular events at the onset of  
113 chemoresistance in TNBC, defining a common Achilles' heel, to target chemoresistant cells before  
114 they phenotypically diversify.

115 To follow clonal evolution under therapeutic stress, we had initially introduced unique genetic  
116 barcodes in chemo-naïve MDA-MB468 cells prior to our experiments (Extended Fig. 3a). We leveraged  
117 our previous barcoding method<sup>36</sup> to allow robust detection of barcodes in scRNA-seq data, as shown  
118 by the high fraction of cells with a lineage barcode (Extended Fig. 3b). In addition, we verified that

119 barcodes frequencies detected in scRNA-seq data correlated with those detected in bulk, confirming  
120 the sensitivity of barcode detection in scRNA-seq data (Extended Fig. 3c). Then comparing barcode  
121 diversity at the persister stage, we observed that 5-FU and DMSO-treated cells display equivalent  
122 lineage diversity (Extended Fig. 3d-e), showing that the persister state is multi-clonal. To test if the  
123 lineages that persist are a random draw of the chemo-naive population, we compared barcode  
124 frequencies between the starting population and the 5FU or DMSO-treated cells. As cells after barcode  
125 tagging and before chemotherapy treatment are growing, resulting in several cells with the same  
126 barcodes, if surviving cells had no particular predisposition then they should resemble a random draw  
127 of the chemo-naive barcoded cells (day 0). This is what we indeed observed for DMSO-treated cells  
128 when compared to random drawing (Extended Fig. 3f-g). However, barcode frequencies of the 5-FU  
129 treated cell deviate from the random scenario (Extended Fig. 3f-g), indicating that some lineages  
130 present in the chemo-naive population have a predisposition to tolerate the treatment. This was  
131 further confirmed by the comparison of barcode frequencies across persister states from independent  
132 experiments showing that independent persister populations shared lineage barcodes (Extended Fig.  
133 3h). To monitor clonal evolution within the different subgroups of persister cells, we compared the  
134 barcode diversity within expression clusters (Fig. 1f). We found that lineage diversity decreases over  
135 the course of treatment, eventually leading to few clones dominating the chemoresistant cluster (Fig.  
136 1f). The diversity in the CDH2<sup>+</sup> persister cluster was lower than in the CDH2<sup>-</sup> persister cluster (Fig. 1f),  
137 suggesting that only rare persister cells switched to the CDH2<sup>+</sup> persister state. By combining detection  
138 of lineage barcode and expression programs at single-cell resolution, we demonstrated that a small  
139 pre-disposed subset of cells tolerate chemotherapy, progressively transiting from a CDH2<sup>-</sup> to a CDH2<sup>+</sup>  
140 persister state, and eventually leading fewer cells to resist.

141 To hamper this chemo-driven clonal evolution of cancer cells, we next investigated the molecular basis  
142 of such rapid phenotypic evolution. Using whole-exome sequencing (Extended Fig. 4a), we first  
143 analyzed mutations, copy-number alterations (CNA) and related mutational signatures acquired by  
144 persister and resistant cell populations since the onset of 5-FU treatment ('chemo-naive D0')

145 population). We could not identify any recurrent mutations across experiments (Extended Fig. 4b), or  
146 any CNA (amplifications or homozygous deletions) or mutations affecting known driver genes of breast  
147 cancer in any population<sup>16</sup>. Only a minor fraction of mutations found in persister cells were attributed  
148 to 5-FU (mutational signature 17<sup>37</sup>) in comparison to resistant cell populations where over 50% of  
149 acquired mutations are associated to 5-FU exposure ( $p < 10^{-10}$ , Extended Fig.4c), indicating that chemo-  
150 related mutations are acquired over a timeframe that is not compatible with the rapid phenotypic  
151 evolution seen in persister cells. Finally, computing cancer cell fractions for each mutation, we  
152 confirmed that persister populations are extensively multi-clonal compared to chemo-naive cells  
153 (Extended Fig. 4d), in line with the lineage barcoding results.

154 We next investigated changes in epigenomes during chemotherapy treatment. Using single-cell  
155 profiling (scChIP-seq) of the repressive H3K27me3 epigenomic mark, we observed that H3K27me3  
156 epigenomes faithfully captured the evolution of cell states with chemotherapy (Fig. 2a, Extended Fig.  
157 5a-c). Persister cells shared a common H3K27me3 epigenome (Fig. 2a-c, cluster C1), in contrast to  
158 resistant cells split in clusters C1 and C3. In comparison to chemo-naive cells, cells from cluster C1  
159 showed recurrent redistribution of H3K27me3 methylation, the highest changes ( $|\log_2FC| > 2$ )  
160 occurring specifically at transcription start sites (TSS) and gene bodies (Fig. 2d) and corresponding to a  
161 loss of H3K27me3 enrichment (75 regions with  $\log_2FC < -2$ , and 2 regions with  $\log_2FC > 2$ ). This depletion  
162 correlated with the highest changes in gene expression observed by scRNA-seq (Fig. 2e-f and Extended  
163 Fig. 5d) and was associated to the transcriptional de-repression of 14% of *persister* genes (Fig. 2g) –  
164 genes overexpressed in persister versus chemo-naive cells. In the chemo-naive cells, two epigenomic  
165 subclones were recurrently identified indicated an epigenomic heterogeneity in this population ( $n=3$   
166 experiments, C2 & C4, Fig. 2b and Extended Fig. 5e-f). In contrast to cells from cluster C4 (median  
167 correlation score  $r = -0.34$ , no cells over  $r = 0.20$ ), a fraction of cells within cluster C2 shared epigenomic  
168 similarities with cells from C1 (49/381 cells over  $r = 0.20$ , Fig. 2c and Extended Fig. 5g-h), but remained  
169 discernible from the pool of persister cells (no cells from C2 over median  $r$  of C1, see Methods). This  
170 suggests that cells from C2 could fuel the persister population when exposed to chemotherapy, with

171 the need of chemo-induced chromatin changes to achieve tolerance. In addition to these two  
172 epigenomic subclones within the chemo-naive cells, we also detected rare cells with a persister  
173 epigenomic signature, in only one of our three experiments (60/976 chemo-naive-D60-#1 cells in  
174 cluster C1 – Extended Fig. 5f), suggesting that spontaneous transition to H3K27me3 persister state  
175 rarely occurs in the absence of chemotherapy.

176 To test whether H3K27me3 enrichment was the lock to the persister expression program in  
177 chemo-naive cells, we treated cancer cells with the EZH2 inhibitor (EZH2i) UNC1999<sup>38</sup>, to deplete  
178 H3K27me3 from cells (Extended Fig. 5i), in the absence of chemotherapy. EZH2i treatment  
179 phenocopied persister state to chemotherapy as expression fold-change induced by EZH2i were  
180 specifically correlated to those induced by chemotherapy exposure at early time points (Fig. 2h,  
181 Extended Fig. 5j,  $r=0.71$  versus  $r=0.31$  with changes in resistant cells). Furthermore, we observed that  
182 EZH2i was sufficient to lead to the activation of 62% of H3K27me3-enriched *persister* genes (15/24  
183 genes), suggesting that H3K27me3 was the sole lock to their activation (Fig. 2i and Extended Fig. 5k-l).  
184 EZH2i was also sufficient to lead to the over-expression of 61% of *persister* genes independently of any  
185 H3K27me3 enrichment in chemo-naive cells (86/144 genes), such as *KRT14*, suggesting that these genes  
186 might be targets of H3K27me3-regulated *persister* genes.

187 As we observed H3K27me3 changes precisely at TSS, we further explored the evolution of chromatin  
188 modifications at TSS, focusing on H3K4me3 - trimethylation at lysine 4 of histone H3 - a permissive  
189 histone mark shown to accumulate over TSS with active transcription. In contrast to single-cell  
190 H3K27me3 epigenomes which were sufficient to separate cell states along treatment (Fig 2a),  
191 individual H3K4me3 epigenomes of chemo-naive and persister cells were indiscernible (Fig. 3a and  
192 Extended Fig. 6a-b). Comparing H3K4me3 single-cell tracks of chemo-naive and persister cells (Fig. 3b  
193 and Extended Fig. 6c), we observed sparse H3K4me3 enrichment at the TSS of *persister* genes already  
194 in chemo-naive cells, compared to house-keeping genes (Extended Fig. 6d). In individual persister cells,  
195 H3K4me3 enrichment was significantly more synchronous at these TSS (Extended Fig. 6e,  $p=9.2 \cdot 10^{-3}$ )  
196 than in chemo-naive cells. Altogether, H3K4me3 and H3K27me3 could either accumulate on the same



197 TSS but in different chemonaive cells, or H3K4me3 could accumulate together with H3K27me3 in a  
198 subset of cells.

199 To test whether H3K4me3 could co-exist with H3K27me3 in the same individual cells prior to  
200 chemotherapy exposure, we performed successive immunoprecipitation of H3K27me3 with H3K4me3  
201 or H3K27me3 with isotype control (IgG). We detected  $n=1,547$  transcription start sites significantly  
202 enriched in DNA immunoprecipitated with both H3K27me3 and H3K4me3, compared to the control  
203 (H3K27me3/IgG) precipitated fraction (peak-ratio $>0.15$ , q-value $<1.0 \cdot 10^{-3}$ , Extended Fig. 6g). We found  
204 that bivalent chromatin in chemonaive cells (D0) was detected at genes associated to basal and EMT  
205 pathways, as well as various developmental pathways (e.g Hedgehog pathway) (Fig. 3c-d and Extended  
206 Fig. 6f), and at the ligand of the TGF- $\beta$  pathway, TGF- $\beta$ 1 (Fig. 3c). The majority of K27-regulated  
207 *persisters* genes (18 out of 24) were found in a bivalent chromatin configuration in the chemonaive cell  
208 population (Fig. 3c, Extended Fig. 6f). *In vivo*, we observed enrichment of H3K27me3 and H3K4me3  
209 modifications measured independently at  $n=1,370$  TSS, particularly at EMT-associated genes and TGF-  
210  $\beta$ 2 (Fig. 3e-f and Extended Fig. 6h-i), corroborating that *persisters* genes are in a bivalent configuration  
211 in chemonaive cells.

212 To further validate that H3K27me3 distribution regulates the emergence of *persisters* cells, we next  
213 modulated H3K27me3 distribution simultaneously to chemotherapy. We used both the EZH2 inhibitor  
214 (EZH2i - UNC1999<sup>38</sup>), and a KDM6A/B inhibitor (KDM6A/Bi - GSK-J4<sup>39</sup>) to prevent demethylation of  
215 H3K27me3 residues. Co-treating cells with one of these modulators together with 5-FU, we observed  
216 opposite modulation of the ability of cells to tolerate the chemotherapy. EZH2i increased the number  
217 of *persisters* cells, whereas KDM6A/Bi led to a decrease in the number of *persisters* at day 21 (Fig. 4a-  
218 b). At day 60, KDM6A/Bi further completely abolished the growth of *persisters* cells under 5-FU,  
219 whereas it has no effect on chemonaive cancer cells (Fig. 4c and Extended Fig. 7a). These results were  
220 confirmed in a second TNBC cell line HCC38, albeit to a lesser extent for EZH2i (Extended Fig. 7b-c). We  
221 then tested how EZH2i affected cell fate of *persisters* cells. Comparing the number of unique barcodes  
222 present in the two clusters under chemotherapy pressure with or without EZH2i (Extended Fig. 3a),

223 we observed that co-treating cells with EZH2i and 5-FU increases the number of lineage barcodes in  
224 persister cells, and to a large extent in C4/CDH2+ cluster (Fig. 4d-f). These results showed that under  
225 EZH2i cancer cells have an increased potential to reach persister state, and a mesenchymal CDH2+  
226 state. Overall, inhibiting the removal of methyl groups at H3K27 prevented cells from reaching  
227 chemotolerance and resistance, demonstrating that some cancer cells need to actively demethylate  
228 H3K27me3 residues to reach persister state and to proliferate under chemotherapy exposure.  
229 Conversely, depleting H3K27me3 from chemo-naïve cells not only launched a persister-like expression  
230 program, but it also enhanced chemotolerance. These results were consistent with a mechanism  
231 where persister genes would be repressed by H3K27me3 in chemo-naïve cells, and primed with  
232 stochastic H3K4me3 in a subset of cells – loss of H3K27me3 being the key to activation.

233 In conclusion, our study shows that the transition to persister state in TNBC is dependent on the  
234 control of H3K27me3 distribution. We propose that combining chemotherapy with histone  
235 demethylase inhibitors at the onset of chemotherapy exposure will decrease the pool of persister cells,  
236 and thereby decrease recurrence. We demonstrate a role for both H3K27me3 writer and erasers in  
237 regulating the phenotypic switch from chemo-naïve to chemopersister state, highlighting the  
238 instrumental role of repressive histone landscapes as determinants of cell fate. Several studies had  
239 started to interrogate which epigenetic modifiers could regulate expression programs of persister or  
240 resistant cells, but studying them in isolation<sup>5,12,14,40,41</sup>. We also show that the *persister* expression  
241 program is primed in chemo-naïve cells with a stochastic presence of H3K4me3 but is repressed by  
242 H3K27me3. In other words, genes are ready to be activated, H3K27me3 remaining the only lock to  
243 activation. Persisters are cells without H3K27me3 or the one releasing the H3K27me3 lock, or a mixture  
244 of both phenomena. We observe epigenomic priming of signaling pathways known to participate to  
245 drug resistance in TNBC<sup>42</sup>, including Hedgehog, WNT (Extended Fig. 2f), TGF- $\beta$  and ATP-binding  
246 cassette drug transporters pathways (Extended Fig. 2f). Such epigenomic priming is reminiscent of  
247 developmental bivalency priming mechanisms<sup>43</sup> found in stem cells prior to differentiation and  
248 appears key for the rapid activation of the genes upon therapeutic stress. Remains to be understood,

249 how only a fraction of bivalent genes are targeted by gene activation upon chemotherapy exposure,  
250 whether tolerance to different drugs triggers the activation of the same set of bivalent genes, and  
251 whether such mechanisms could be shared across cancer types. Determining the precise addressing  
252 mechanisms that target H3K27me3 and H3K4me3 writers and readers to TSS of bivalent genes in  
253 cancer cells, will be instrumental in the future to identify dedicated co-factors which could serve as  
254 alternative therapeutic targets to restrict the epigenetic plasticity of cancer cells.

255

## 256 References

- 257 1. Li, X. *et al.* Triple-negative breast cancer has worse overall survival and cause-specific survival than  
258 non-triple-negative breast cancer. *Breast Cancer Res. Treat.* **161**, 279–287 (2017).
- 259 2. Vallette, F. M. *et al.* Dormant, quiescent, tolerant and persister cells: Four synonyms for the same  
260 target in cancer. *Biochemical Pharmacology* **162**, 169–176 (2019).
- 261 3. Shen, S., Vagner, S. & Robert, C. Persistent Cancer Cells: The Deadly Survivors. *Cell* **183**, 860–874  
262 (2020).
- 263 4. Balko, J. M. *et al.* Profiling of residual breast cancers after neoadjuvant chemotherapy identifies  
264 DUSP4 deficiency as a mechanism of drug resistance. *Nat. Med.* **18**, 1052–1059 (2012).
- 265 5. Vinogradova, M. *et al.* An inhibitor of KDM5 demethylases reduces survival of drug-tolerant cancer  
266 cells. *Nat Chem Biol* **12**, 531–538 (2016).
- 267 6. Echeverria, G. V. *et al.* Resistance to neoadjuvant chemotherapy in triple-negative breast cancer  
268 mediated by a reversible drug-tolerant state. *Sci. Transl. Med.* **11**, eaav0936 (2019).
- 269 7. Jones, P. A., Issa, J.-P. J. & Baylin, S. Targeting the cancer epigenome for therapy. *Nat Rev Genet* **17**,  
270 630–641 (2016).
- 271 8. Ramirez, M. *et al.* Diverse drug-resistance mechanisms can emerge from drug-tolerant cancer  
272 persister cells. *Nat Commun* **7**, 10690 (2016).
- 273 9. Cortazar, P. *et al.* Pathological complete response and long-term clinical benefit in breast cancer:  
274 the CTNeoBC pooled analysis. *The Lancet* **384**, 164–172 (2014).
- 275 10. Hata, A. N. *et al.* Tumor cells can follow distinct evolutionary paths to become resistant to  
276 epidermal growth factor receptor inhibition. *Nat Med* **22**, 262–269 (2016).
- 277 11. Kim, C. *et al.* Chemoresistance Evolution in Triple-Negative Breast Cancer Delineated by Single-Cell  
278 Sequencing. *Cell* **173**, 879–893.e13 (2018).
- 279 12. Sharma, S. V. *et al.* A Chromatin-Mediated Reversible Drug-Tolerant State in Cancer Cell  
280 Subpopulations. *Cell* **141**, 69–80 (2010).
- 281 13. Shaffer, S. M. *et al.* Rare cell variability and drug-induced reprogramming as a mode of cancer drug  
282 resistance. *Nature* **546**, 431–435 (2017).
- 283 14. Liao, B. B. *et al.* Adaptive Chromatin Remodeling Drives Glioblastoma Stem Cell Plasticity and Drug  
284 Tolerance. *Cell Stem Cell* **20**, 233–246.e7 (2017).
- 285 15. Rambow, F. *et al.* Toward Minimal Residual Disease-Directed Therapy in Melanoma. *Cell* **174**, 843–  
286 855.e19 (2018).
- 287 16. Nik-Zainal, S. *et al.* Landscape of somatic mutations in 560 breast cancer whole-genome sequences.  
288 *Nature* **534**, 47–54 (2016).
- 289 17. Mazor, T. *et al.* DNA Methylation and Somatic Mutations Converge on the Cell Cycle and Define  
290 Similar Evolutionary Histories in Brain Tumors. *Cancer Cell* **28**, 307–317 (2015).
- 291 18. Gaiti, F. *et al.* Epigenetic evolution and lineage histories of chronic lymphocytic leukaemia. *Nature*  
292 **569**, 576–580 (2019).
- 293 19. Grosselin, K. *et al.* High-throughput single-cell ChIP-seq identifies heterogeneity of chromatin

- 294 states in breast cancer. *Nat. Genet.* **51**, 1060–1066 (2019).
- 295 20. Kaya-Okur, H. S. *et al.* CUT&Tag for efficient epigenomic profiling of small samples and single cells.
- 296 *Nat Commun* **10**, 1930 (2019).
- 297 21. Marangoni, E. *et al.* A New Model of Patient Tumor-Derived Breast Cancer Xenografts for Preclinical
- 298 Assays. *Clinical Cancer Research* **13**, 3989–3998 (2007).
- 299 22. Longley, D. B., Harkin, D. P. & Johnston, P. G. 5-fluorouracil: mechanisms of action and clinical
- 300 strategies. *Nat. Rev. Cancer* **3**, 330–338 (2003).
- 301 23. Zhang, H. *et al.* Forkhead Transcription Factor *Foxq1* Promotes Epithelial–Mesenchymal Transition
- 302 and Breast Cancer Metastasis. *Cancer Res* **71**, 1292–1301 (2011).
- 303 24. Qiao, Y. *et al.* FOXQ1 Regulates Epithelial-Mesenchymal Transition in Human Cancers. *Cancer*
- 304 *Research* **71**, 3076–3086 (2011).
- 305 25. Ulanovskaya, O. A., Zuhl, A. M. & Cravatt, B. F. NNMT promotes epigenetic remodeling in cancer
- 306 by creating a metabolic methylation sink. *Nat. Chem. Biol.* **9**, 300–306 (2013).
- 307 26. Shaul, Y. D. *et al.* Dihydropyrimidine Accumulation Is Required for the Epithelial-Mesenchymal
- 308 Transition. *Cell* **158**, 1094–1109 (2014).
- 309 27. Liang, L., Zeng, M., Pan, H., Liu, H. & He, Y. Nicotinamide N-methyltransferase promotes epithelial-
- 310 mesenchymal transition in gastric cancer cells by activating transforming growth factor- $\beta$ 1 expression.
- 311 *Oncol Lett* (2018) doi:10.3892/ol.2018.7885.
- 312 28. Bhola, N. E. *et al.* TGF- $\beta$  inhibition enhances chemotherapy action against triple-negative breast
- 313 cancer. *J. Clin. Invest.* **123**, 1348–1358 (2013).
- 314 29. Jang, M. H., Kim, H. J., Kim, E. J., Chung, Y. R. & Park, S. Y. Expression of epithelial-mesenchymal
- 315 transition-related markers in triple-negative breast cancer: ZEB1 as a potential biomarker for poor clinical
- 316 outcome. *Human Pathology* **46**, 1267–1274 (2015).
- 317 30. Fischer, K. R. *et al.* Epithelial-to-mesenchymal transition is not required for lung metastasis but
- 318 contributes to chemoresistance. *Nature* **527**, 472–476 (2015).
- 319 31. Zheng, X. *et al.* Epithelial-to-mesenchymal transition is dispensable for metastasis but induces
- 320 chemoresistance in pancreatic cancer. *Nature* **527**, 525–530 (2015).
- 321 32. Zeng, D. *et al.* Inhibition of Notch1 reverses EMT and chemoresistance to cisplatin *via* direct
- 322 downregulation of MCAM in triple-negative breast cancer cells. *Int. J. Cancer* **147**, 490–504 (2020).
- 323 33. Brunen, D. *et al.* TGF- $\beta$ : An emerging player in drug resistance. *Cell Cycle* **12**, 2960–2968 (2013).
- 324 34. Romano, G. *et al.* The TGF- $\beta$  pathway is activated by 5-fluorouracil treatment in drug resistant
- 325 colorectal carcinoma cells. *Oncotarget* **7**, 22077–22091 (2016).
- 326 35. Chen, J. *et al.* A restricted cell population propagates glioblastoma growth after chemotherapy.
- 327 *Nature* **488**, 522–526 (2012).
- 328 36. Eisele, A. S. *et al.* Erythropoietin directly affects single hematopoietic stem cell differentiation after
- 329 transplantation. <http://biorxiv.org/lookup/doi/10.1101/2020.04.20.050146> (2020)
- 330 doi:10.1101/2020.04.20.050146.
- 331 37. Christensen, S. *et al.* 5-Fluorouracil treatment induces characteristic T>G mutations in human
- 332 cancer. *Nat Commun* **10**, 4571 (2019).
- 333 38. Konze, K. D. *et al.* An Orally Bioavailable Chemical Probe of the Lysine Methyltransferases EZH2 and
- 334 EZH1. *ACS Chem. Biol.* **8**, 1324–1334 (2013).
- 335 39. Kruidenier, L. *et al.* A selective jumonji H3K27 demethylase inhibitor modulates the
- 336 proinflammatory macrophage response. *Nature* **488**, 404–408 (2012).
- 337 40. Hinohara, K. *et al.* KDM5 Histone Demethylase Activity Links Cellular Transcriptomic Heterogeneity
- 338 to Therapeutic Resistance. *Cancer Cell* **34**, 939–953.e9 (2018).
- 339 41. Gardner, E. E. *et al.* Chemosensitive Relapse in Small Cell Lung Cancer Proceeds through an EZH2-
- 340 SLFN11 Axis. *Cancer Cell* **31**, 286–299 (2017).
- 341 42. Nedeljković, M. & Damjanović, A. Mechanisms of Chemotherapy Resistance in Triple-Negative
- 342 Breast Cancer—How We Can Rise to the Challenge. *Cells* **8**, 957 (2019).
- 343 43. Bonifer, C. & Cockerill, P. N. Chromatin priming of genes in development: Concepts, mechanisms
- 344 and consequences. *Experimental Hematology* **49**, 1–8 (2017).
- 345

## 346 Legends

347 **Figure 1: Identification of a pool of basal persister cells in TNBC *in vivo* and *in vitro*.** **a.** (Up) Graph of  
348 the relative tumor volumes (RTV, mm<sup>3</sup>) over time (days). Colored growth curves correspond to tumors  
349 which have been further studied by scRNA-seq. Black arrows indicate the start of the second round of  
350 Capecitabine treatment for the corresponding mice. (Down) Phenotypes and cell numbers are  
351 indicated, with the number of mice used to collect samples in brackets. **b.** (Up) Graph representation  
352 of the cell proliferation of triple negative breast cancer cell line MDA-MB-468 (MM468) treated with  
353 5-FU (green for persister cells, and orange lines for resistant cells) or with DMSO (chemonaive - grey  
354 lines). Each dot corresponds to an independent experiment. (Down) Schematic view of the  
355 experimental design. Experience replicate numbers and passages of the cells at D0 are indicated. **c.**  
356 UMAP representation of PDX scRNA-seq datasets, colored according to sample of origin (first panel)  
357 or gene expression signal for differentially expressed genes between persister cells and chemonaive  
358 tumor cells (remaining panels), log<sub>2</sub>FC and adjusted p-values are indicated above the graph. **d.** UMAP  
359 representation of MDA-MB-468 cells scRNA-seq datasets, colored according to the sample ID (first  
360 panel) or gene expression signal for differentially expressed genes between persister cells and  
361 chemonaive cells (*KRT14* and *TGFB1* panels) or for a differentially expressed gene between the two  
362 persisters clusters, *i.e.* clusters C4 vs C2 (*CDH2* panel). Chemonaive population (in grey) corresponds  
363 to DMSO-D0-#1. **e.** Barplot displaying the top 5 pathways activated in persister cells both *in vivo* and  
364 *in vitro* from MSigDB c2\_curated Breast, c2\_KEGG, c7\_Hallmark and c5\_GO annotations. x-axis  
365 corresponds to -log<sub>10</sub> adjusted p-values for PDX. **f.** (Left) UMAP representation of scRNA-seq as in 1d,  
366 cells are colored according to lineage barcode. (Right) Histogram of the lineage barcodes diversity  
367 detected in the scRNA-seq data within Louvain partition clusters, and across samples. Colors  
368 correspond to sample ID as in 1d.

369  
370 **Figure 2: H3K27me3 represses the persister expression program in chemonaive cells.** **a.** UMAP  
371 representation of scChIP-seq H3K27me3 datasets, cells are colored according to the sample of origin.  
372 Chemonaive samples correspond to DMSO-treated cells, persister and resistant samples correspond  
373 to 5-FU-treated cells, days of treatment are indicated. **b.** Same as in a. with cells colored according to  
374 epigenomic clusters. **c.** Graph representation of the cell to cell inter-correlation between clusters C1,  
375 C2 or C4 and the cluster C1. **d.** Genomic association between H3K27me3 peaks and gene annotation.  
376 Full bars indicate adjusted p-value < 1.0 × 10<sup>-2</sup>. Empty bars indicate non-significant adjusted p-values.  
377 "PC" indicates protein coding gene **e.** Repartition of H3K27me3 depleted peaks within re-expression  
378 quantiles in persister cells. **f.** Cumulative scH3K27me3 profiles over *TGFB1* and *FOXQ1* in chemonaive  
379 and persister cells (D33). Log<sub>2</sub>FC and adjusted p-value correspond to differential analysis comparison

380 of cells from cluster C1 versus clusters C2 + C4. **g.** Pie chart displaying the fraction of persister genes  
381 potentially regulated by H3K27me3 in MM468 cells. **h.** Dot plot representing log2 expression fold-  
382 change induced by 5-FU or EZH2i at D33 versus D0. Correlation scores and associated p-value are  
383 indicated. **i.** Bulk H3K27me3 chromatin profiles for *TGFB1* and *FOXQ1* in cells treated with DMSO, 5-  
384 FU or EZH2i at D33.

385

386 **Figure 3: Epigenomes of chemo-naive cells are primed with co-accumulation of H3K27me3 and**  
387 **H3K4me3.** **a.** UMAP representation of scChIP-seq H3K4me3 datasets, cells are colored according to  
388 the sample of origin. **b.** Cumulative scH3K4me3 enrichment profiles over *TGFB1* and *FOXQ1* in  
389 chemo-naive cells (D0) and persister cells (D60). **c.** Bulk H3K27me3->H3K4me3 and H3K27me3->IgG  
390 chromatin profiles of *TGFB1* and *FOXQ1* in the chemo-naive population (D0). Enrichment tracks show  
391 enrichment over IgG control with associated odd ratio and adjusted p-value. **d.** Barplot displaying the  
392 top 5 pathways (as in Fig. 1e) enriched in genes detected with combined H3K27me3/H3K4me3 in the  
393 chemo-naive MDA-MB-468 cell population (D0). **e.** Density plot representing cumulative scH3K27me3  
394 and scH3K4me3 log2 enrichment at TSS in two independent cell populations within chemo-naive PDX.  
395 **f.** Cumulative scH3K27me3 and scH3K4me3 profiles over *TGFB2* and *ELN* in the chemo-naive PDX  
396 tumor.

397

398 **Figure 4: EZH2 inhibition modulates cell fate upon chemotherapy exposure.** **a.** Representative  
399 pictures of MDA-MB-468 cells treated 21 days with 5-FU alone or in combination with an inhibitor of  
400 EZH2 (UNC1999) or an inhibitor of KDM6A/B proteins (GSKJ4). **b.** Histogram representing the number  
401 of cells after treatment with 5-FU alone, 5-FU and EZH2i or KDM6i over 21 days, relative to the number  
402 of cells at D0. (n=3, Mean  $\pm$  sd). **c.** Colony forming assay of MDA-MB-468 co-treated with DMSO or 5-  
403 FU and indicated concentrations of KDM6A/Bi for 60 days. The data corresponds to 1 of 3 biological  
404 replicates. **d.** UMAP representation of scRNA-seq datasets, colored according to the sample ID. **e.** As  
405 in 4d. cells colored according to lineage barcode. **f.** Histogram of the diversity of lineage barcodes  
406 detected in scRNA-seq data in each louvain partition cluster obtained from the chemo-naive  
407 population, 5-FU or EZH2i persister cells (D33). Colors correspond to sample ID as in 4d.

408

409

410

## 411 **Methods**

412 **PDXs.** Female Swiss nude mice were purchased from Charles River Laboratories and maintained under  
413 specific-pathogen-free conditions. Mouse care and housing were in accordance with institutional  
414 guidelines and the rules of the French Ethics Committee (project authorization no. 02163.02). In this  
415 study, we used a xenograft model generated from a residual triple-negative breast cancer post-  
416 neoadjuvant chemotherapy (HBCx95) established previously at Curie Institute with informed consent  
417 from the patient<sup>44,45</sup>. Five mice were not treated and kept as controls and twenty-seven mice were  
418 treated orally with Capecitabine (Xeloda; Roche Laboratories) at a dose of 540 mg/kg, 5 d/week for 6  
419 to 14 weeks. Relative tumor volumes (mm<sup>3</sup>) were measured as described previously<sup>21</sup>. Latency was  
420 defined as the number of days between the observation of a complete response (Tumor size < 10  
421 mm<sup>3</sup>) after the first round of Capecitabine treatment, and the detection of a recurrent tumor (Tumor  
422 size > 10 mm<sup>3</sup>). Eight mice were sacrificed after the first round of chemotherapy to study residual (2  
423 mice) and persister (6 mice) human tumor cells. Seven mice with recurrent tumors (tumor volume  
424 between 200 and 600 mm<sup>3</sup>) were treated for a second round of Capecitabine. The GraphPad PRISM 9  
425 was used for statistics in Extended Fig.1b. The results represent the mean  $\pm$  sd and statistical analysis  
426 was performed using two-tailed Mann-Whitney test.

427 Before downstream analysis (scChIP-seq, scRNA-seq), control and Capecitabine treated tumors were  
428 digested for 2 h at 37 °C with a cocktail of Collagenase I (Roche, Ref: 11088793001) and Hyaluronidase  
429 (Sigma-Aldrich, Ref: H3506). Cells were then individualized at 37°C using a cocktail of 0.25% Trypsin-  
430 Versen (Thermo Fisher Scientific, Ref: 15040-033), Dispase II (Sigma-Aldrich, Ref: D4693) and DNase I  
431 (Roche, Ref: 11284932001) as described previously<sup>46</sup>. Then, eBioscience red blood cell lysis buffer  
432 (Thermo Fisher Scientific, Ref: 00-4333-57) was added to the cell suspension to remove red blood cells.  
433 To increase the viability of the final cell suspension, dead cells were removed using the Dead Cell  
434 Removal Kit (Miltenyi Biotec, Ref:130-090-101).

435

436 **Cell lines, culture conditions and drug treatments.** MDA-MB-468 cells were cultured in DMEM (Gibco-  
437 BRL, Ref: 11966025), supplemented with 10% heat-inactivated fetal calf serum (Gibco-BRL, Ref: 10270-  
438 106). HCC38 cell lines were cultured in RPMI 1640 (Gibco-BRL, Ref: 11875085), supplemented with  
439 10% heat-inactivated fetal calf serum. All cell lines were cultured in a humidified 5% CO<sub>2</sub> atmosphere  
440 at 37 °C, and were tested as mycoplasma negative. GSKJ4 (KDM6A/B inhibitor, Sigma, Ref: SML0701),  
441 GSKJ5 (GSK-J4 inactive isomer, Abcam, Ref: ab144397) and UNC1999 (EZH2 inhibitor, Abcam, Ref:  
442 ab146152) were used at indicated concentrations. Cells were treated with 5  $\mu$ M of 5-FU (Sigma, Ref:  
443 F6627) alone or in combination with KDM6A/Bi or EZH2i for indicated days.

444

445 **Colony forming assay.** TBNC cells were plated in 6 multi-well plates at a density of 200,000 cells per  
446 well and treated with the indicated drugs for 60 days (MDA-MB-468) or 50 days (HCC38). Treated  
447 plates were monitored for growth using a microscope. At the time of maximum foci formation, colony  
448 formation was evaluated after a staining with 0.5% Crystal Violet (Sigma, Ref: C3886).

449

450 **Cell proliferation, doubling time and IC50.** MDA-MB-468 and HCC38 cells were stained with Trypan  
451 Blue (Invitrogen, Ref: T10282) exclusion test, and counted using a Countess automated cell counter  
452 (Invitrogen, Ref: C10228) at indicated time of treatment (Fig.4b and Extended Fig.7b).

453 Doubling time (Extended Fig.2c) was calculated using this formula:

454 
$$\text{“DoublingTime} = \text{duration} * \log(2) / (\log(\text{Final Concentration}) - \log(\text{Initial Concentration}))\text{”}$$

455 For chemo-naive condition and resistant condition, cell numbers were evaluated on cell population  
456 during 10 days (n=3). For persister condition, cells were counted manually under the microscope at  
457 day 13 and day 30 of treatment. Doubling time of 5-FU growing persister cells was studied from single  
458 cell to confluent colony by assaying cell number every 4 days during 27 days (n= 6 single cells) (Figure  
459 1b).

460 MDA-MB-468 chemo-naive and chemoresistant cells were plated in 96 multi-well plates at a density of  
461 10,000 cells per well and treated with increased concentration of 5-FU (1 $\mu$ M to 0.5M) for 72h. Cell  
462 cytotoxicity was assayed with XTT kit (Sigma, Ref: 11465015001) and IC50 was calculated as the  
463 concentration of 5-FU that is required to obtain 50% of cell viability (Extended Fig. 2c).

464 The GraphPad PRISM 9 was used for statistics and the results represent the mean  $\pm$  sd of three  
465 independent experiments. Statistical analysis was performed using the Bonferroni test for multiple  
466 comparisons between samples (Fig.4b and Extended Fig.2c-right) or one-tailed Mann-Whitney test for  
467 the comparison between two conditions (Extended Fig. 2c-left and Extended Fig.7b).

468

469 **Western blotting.** DMSO- and EZH2i-treated cells (D33-#8) were lysed at 95°C for 10 minutes in  
470 Laemmli buffer (50 mM Tris-HCl [pH 6.8], 2% SDS, 5% glycerol, 2 mM DTT, 2.5 mM EDTA, 2.5 mM EGTA,  
471 4 mM Sodium Orthovanadate, 20 mM Sodium Fluoride, protease inhibitors, phosphatase inhibitors)  
472 and proteins concentrations were measured using a Pierce BCA protein Assay Kit (Thermo Fisher  
473 Scientific, Ref: 23225/23227). 10  $\mu$ g of proteins were then separated on a 4-15% Mini-PROTEAN TGX  
474 Stain-Free Gel (Bio-Rad, Ref: 4568085) at 160V. After transfer, the membrane was exposed to UV light  
475 (Bio-Rad, ChemiDoc MP) and the image was further used for total protein quantification. The  
476 membrane was then blocked for 1 h at room temperature in PBS pH 7.4 containing 0.1% Tween-20  
477 and 1% milk (Regilait). Incubation anti-H3K27me3 (Dilution: 1:2000, Cell Signaling, Ref: 9733) primary  
478 antibodies diluted in PBS pH 7.4, 0.1% Tween-20 were performed at 4°C overnight. Following 2 h  
479 incubation at room temperature with an anti-rabbit peroxidase-conjugated secondary antibody



480 (Dilution: 1:10000, Thermo Fisher Scientific, Ref: 31460) diluted in PBS pH 7.4, 0.1% Tween-20,  
481 antibody-specific labeling bands were revealed (Bio-Rad, ChemiDoc MP) using a SuperSignal West Pico  
482 PLUS Chemiluminescent Substrate (Thermo Fisher Scientific, Ref: 34579).

483

484 **Lentivirus packaging and cell transduction.** Lentivirus was produced by transfecting the barcode  
485 plasmids pRRL-CMV-GFP-BCv2Ascl and p8.9-QV and pVSVG into HEK293T cells as previously  
486 described<sup>36</sup>. MDA-MB-468 cells from ATCC were infected at passage 11 with lentivirus produced from  
487 the barcode library (pRRL-CMV-GFP-BCv2Ascl) which includes 18206 different barcodes of 20bp of a  
488 random stretch, at a low multiplicity of infection (MOI 0.1) to minimize the number of cells marked by  
489 multiple barcodes. Three weeks after transduction, cells were sorted for GFP expression to select cells  
490 with barcode insertion, and used for drug treatment.

491

492 **Single-cell RNA-seq.** For each single cell suspension (DMSO-D0-#1, 5-FU-D33-#1, 5-FU-D214-#1, 5-FU-  
493 D67-#2, 5-FU-D171-#2, 5-FU-D50-#3, 5-FU-D77-#3 and 5-FU-D202-#3), approximately 3,000 cells were  
494 loaded on a Chromium Single Cell Controller Instrument (Chromium Single Cell 3'v3, 10X Genomics,  
495 Ref: PN-1000075) according to the manufacturer's instructions. Samples and libraries were prepared  
496 according to the manufacturer's instructions. Libraries were sequenced on a NovaSeq 6000 (Illumina)  
497 in PE8-8-91 with a coverage of 50,000 reads/cell.

498

499 **Bulk lineage barcode library preparation and sequencing.** Lineage barcodes are recovered by isolating  
500 genomic DNA from cells of interest (NucleoSpin Tissue, Mini kit for DNA from cells and tissue,  
501 Macherey Nagel, Ref: 740952.50). From the isolated genomic DNA, barcodes are amplified with three  
502 nested PCR steps as described in<sup>36</sup>. In short, after a first specific PCR for the common region of the  
503 lineage barcodes, the amplified material was prepared for sequencing by addition of the illumina  
504 sequencing adaptaters and indexing and purification. Sequencing was done in order to obtain 50 reads,  
505 on average, per barcoded cell.

506

507 **Bulk CHIP-seq.** CHIP experiments were performed as previously described<sup>19</sup> on  $3 \times 10^6$  MDA-MB-468  
508 cells (DMSO-D67-#2, DMSO-D77-#3, DMSO-D113-#4, 5-FU-D67-#2, 5-FU-D77-#3, 5-FU-D113-#4) using  
509 an anti-H3K27me3 antibody (Cell Signaling Technology, Ref: 9733 - C36B11). Sequencing libraries were  
510 prepared using the NEBNext Ultra II DNA Library Prep Kit (NEB, Ref: E7645S) according to the  
511 manufacturer's instructions. Libraries were sequenced on a NovaSeq 6000 (Illumina) in SE50 mode.

512

513 **Single-cell CHIP-seq.** Cells (DMSO-D60-#1, DMSO-D77-#3, DMSO-D131-#5, 5-FU-D33-#1, 5-FU-D67-#2,  
514 5-FU-D171-#2, 5-FU-D147-#3, 5-FU-D131-#6) were labeled by 15 min incubation with 1  $\mu$ M CFSE

515 (CellTrace CFSE, ThermoFisher Scientific, Ref: C34554). Cells were then resuspended in PBS  
516 supplemented with 30% Percoll, 0.1% Pluronic F68, 25 mM Hepes pH 7.4 and 50 mM NaCl. Cell  
517 encapsulation, bead encapsulation and 1:1 droplet fusion was performed as previously described<sup>19</sup>.  
518 Immunoprecipitation, DNA amplification and library were performed as in<sup>19</sup>. Libraries were sequenced  
519 on a NovaSeq 6000 (Illumina) in PE100, with 4 dark cycles on Read 2, with a coverage of 100,000  
520 reads/cell.

521

522 **Quantitative chromatin profiling with chromatin indexing.** Chromatin isolation, indexing,  
523 immunoprecipitation and library preparation was adapted from<sup>47</sup>. Briefly, 50,000 MDA-MB-468 were  
524 lysed and digested with MNase for 20min at 37°C in the following buffer: 46mM Tris-HCl pH 7.4,  
525 0.154M NaCl, 0.1% Triton, 0.1% NaDoc, 4.65mM CaCl<sub>2</sub>, 0.47x Protease Inhibitor Cocktail (Roche, Ref:  
526 11873580001) and 0.09u/uL MNase (Thermo Scientific, Ref: EN0181). Fragmented nucleosomes were  
527 then ligated for at least 24h at 16°C to double-stranded barcoded adapters containing 8bp barcodes  
528 to combine samples: Pac1-T7-Read2-8bpBarcode-linker-Pac1. Next, 5 indexed chromatin samples  
529 (DMSO, 5-FU, UNC, 5-FU + UNC, GSK-J4) were pooled, each containing a different 8-bp barcode, to  
530 perform anti-H3K27me3 ChIP (Cell Signaling, Ref: 9733 - C36B11) on 250,000 cells in total in each pool.  
531 ChIP and DNA amplification was carried out as for scChIP-seq<sup>19</sup> and a sequencing library was produced  
532 for both IP and input pools and sequenced on NovaSeq 6000 (Illumina) in PE100 mode.

533

534 **Sequential ChIP-seq.** Primary ChIP experiments were performed as described previously<sup>19</sup> on 30x 10<sup>6</sup>  
535 untreated chemo-naive MDA-MB-468 cells using the anti-H3K27me3 antibody. After washes, samples  
536 were eluted twice at 37°C for 15 min under agitation in an elution buffer (50mM Tris-Hcl pH8, 5mM  
537 EDTA, 20mM DTT, 1% SDS) as in<sup>48</sup>. Samples were diluted 10 times to decrease SDS and DTT  
538 concentration. 10% of the eluted chromatin was kept as primary ChIP. Secondary ChIP, re-ChIP, was  
539 performed overnight on the rest of the primary immuno-precipitated chromatin using an anti-  
540 H3K4me3 antibody (Cell signaling, Ref: #9751) or using an anti-IgG antibody (Cell signaling, Ref: #3900)  
541 as a control, to determine the background level of the re-ChIP experiment. After washes, samples were  
542 eluted twice at 65°C for 15 min under agitation in 0.1M NaHCO<sub>3</sub> and 1% SDS as in<sup>48</sup>. After reverse  
543 crosslinking and DNA clean-up, 3 to 15 ng of immunoprecipitated DNA were used to prepare the  
544 sequencing libraries using the NEBNext Ultra II DNA Library Prep Kit (NEB, Ref: E7645S) according to  
545 the manufacturer's instructions. Libraries were sequenced on a NovaSeq 6000 (Illumina) in SE100  
546 mode.

547

548 **Whole exome sequencing.** Genomic DNA from samples (DMSO-D0, DMSO-D147-#3, DMSO-D171-#5,  
549 DMSO-D131-#6, 5-FU-D67-#2, 5-FU-D153-#2, 5-FU-D50-#3, 5-FU-D147-#3, 5-FU-D171-#5 and 5-FU-

550 D131-#6) were extracted with NucleoSpin Tissue, Mini kit for DNA from cells and tissue (Macherey  
551 Nagel, Ref: 740952.50) and sequenced on a NovaSeq 6000 (Illumina) with a 100X depth.

552

### 553 **Online references**

554 44. Cottu, P. *et al.* Acquired Resistance to Endocrine Treatments Is Associated with Tumor-Specific  
555 Molecular Changes in Patient-Derived Luminal Breast Cancer Xenografts. *Clinical Cancer Research* **20**,  
556 4314–4325 (2014).

557 45. Marangoni, E. *et al.* Capecitabine Efficacy Is Correlated with TYMP and RB1 Expression in PDX  
558 Established from Triple-Negative Breast Cancers. *Clin Cancer Res* **24**, 2605–2615 (2018).

559 46. Petit, V. *et al.* Optimization of tumor xenograft dissociation for the profiling of cell surface  
560 markers and nutrient transporters. *Lab Invest* **93**, 611–621 (2013).

561 47. van Galen, P. *et al.* A Multiplexed System for Quantitative Comparisons of Chromatin  
562 Landscapes. *Mol. Cell* **61**, 170–180 (2016).

563 48. Desvoyes, B., Sequeira-Mendes, J., Vergara, Z., Madeira, S. & Gutierrez, C. Sequential ChIP  
564 Protocol for Profiling Bivalent Epigenetic Modifications (ReChIP). in *Plant Chromatin Dynamics* (eds.  
565 Bemer, M. & Baroux, C.) vol. 1675 83–97 (Springer New York, 2018).

566

### 567 **Fundings.**

568 This work was supported by the ATIP Avenir program, by Plan Cancer and by the SiRIC-Curie program  
569 SiRIC Grants #INCa-DGOS-4654 and #INCa-DGOS-Inserm\_12554 (to C.V.). NGS was performed by the  
570 ICGex platform of the Institut Curie. The work was supported by an ATIP-Avenir grant from CNRS and  
571 Bettencourt-Schueller Foundation (to L.P.), by the *Labex CeITisPhyBio* (ANR-11-LABX-0038 to L.P.) and  
572 by a starting ERC grant from the H2020 program (758170-Microbar to L.P.).

573

### 574 **Author contributions.**

575 JM, AD, CL, LB, SBT, AE and AT performed experiments. scChIP-seq experiments were conducted  
576 together with SF and KG. PDX experiments were performed by EM, LS and AD. MB and SB performed  
577 sequencing. PP and CV performed omics data analysis. Lineage barcoding data were analyzed by AML,  
578 CV and LP. Whole exome sequencing data were analyzed together with EL. CV, LP and JM conceived  
579 and designed experiments. CV, JM, PP and LP wrote the manuscript with input from all authors.

580

### 581 **Competing interest declaration.**

582 The authors declare no financial competing interest.

583

### 584 **Additional Information.**

585 Correspondence and requests for materials should be addressed to [celine.vallot@curie.fr](mailto:celine.vallot@curie.fr).

# Figure 1

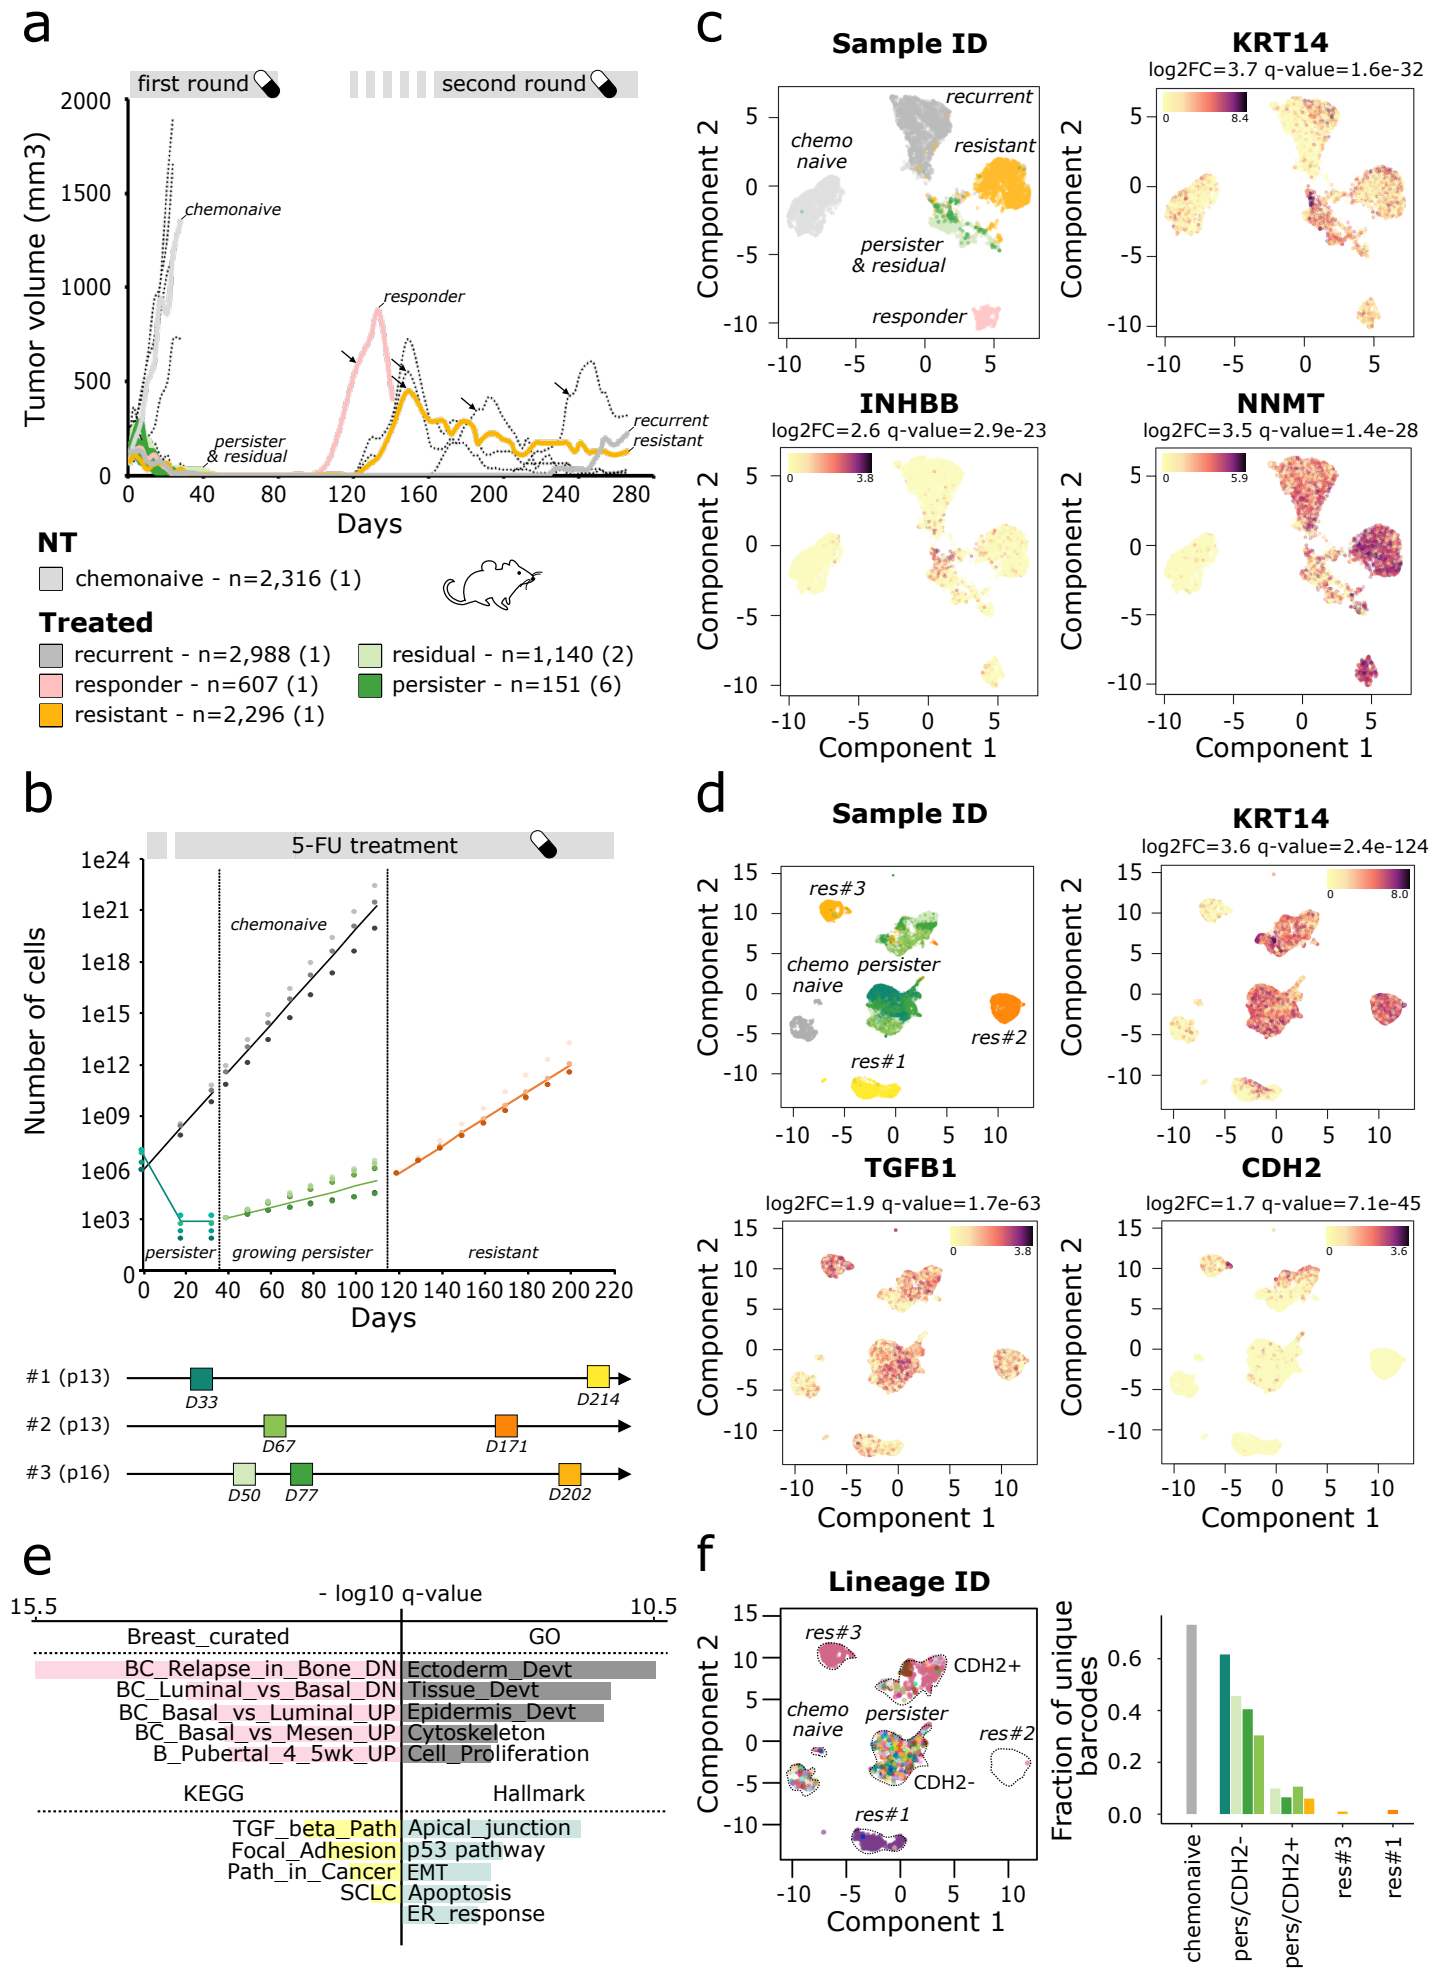

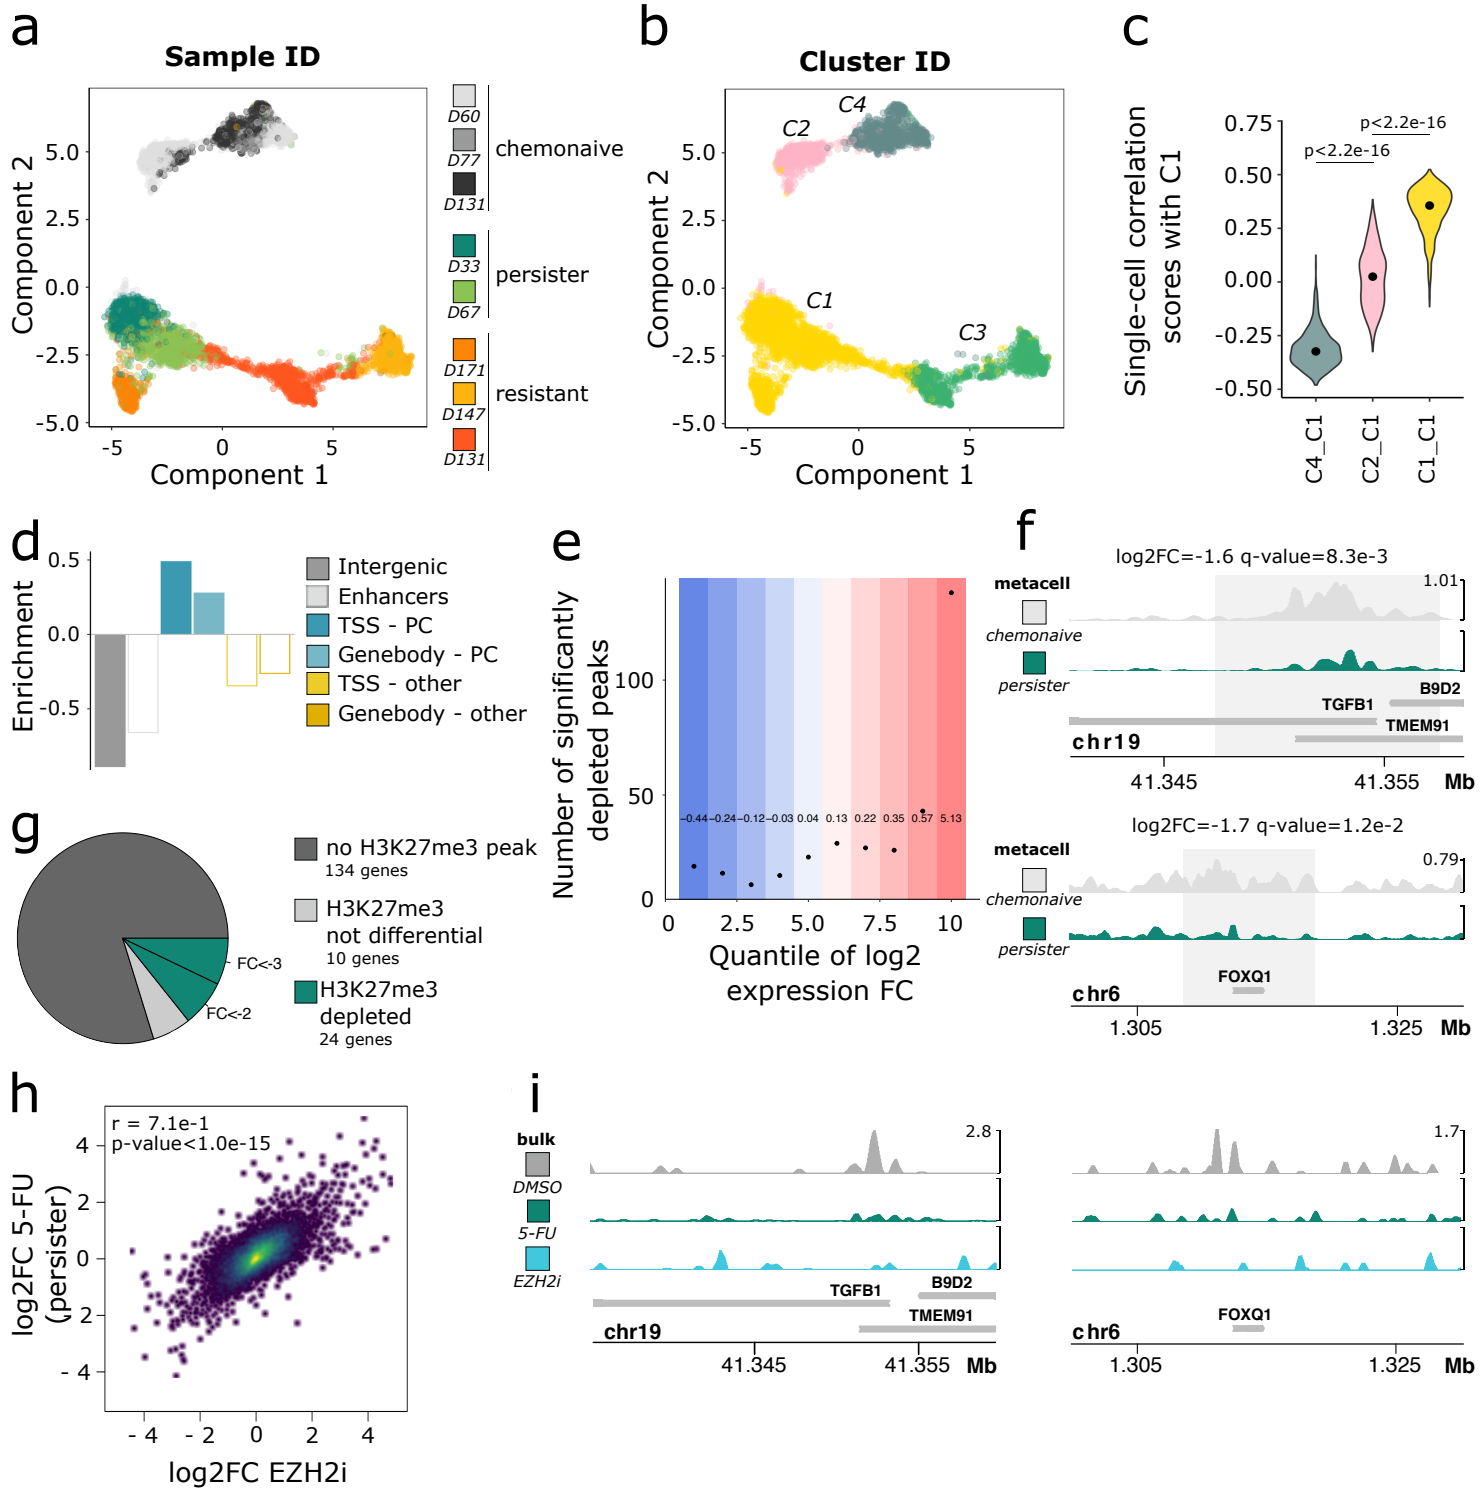

# Figure 3

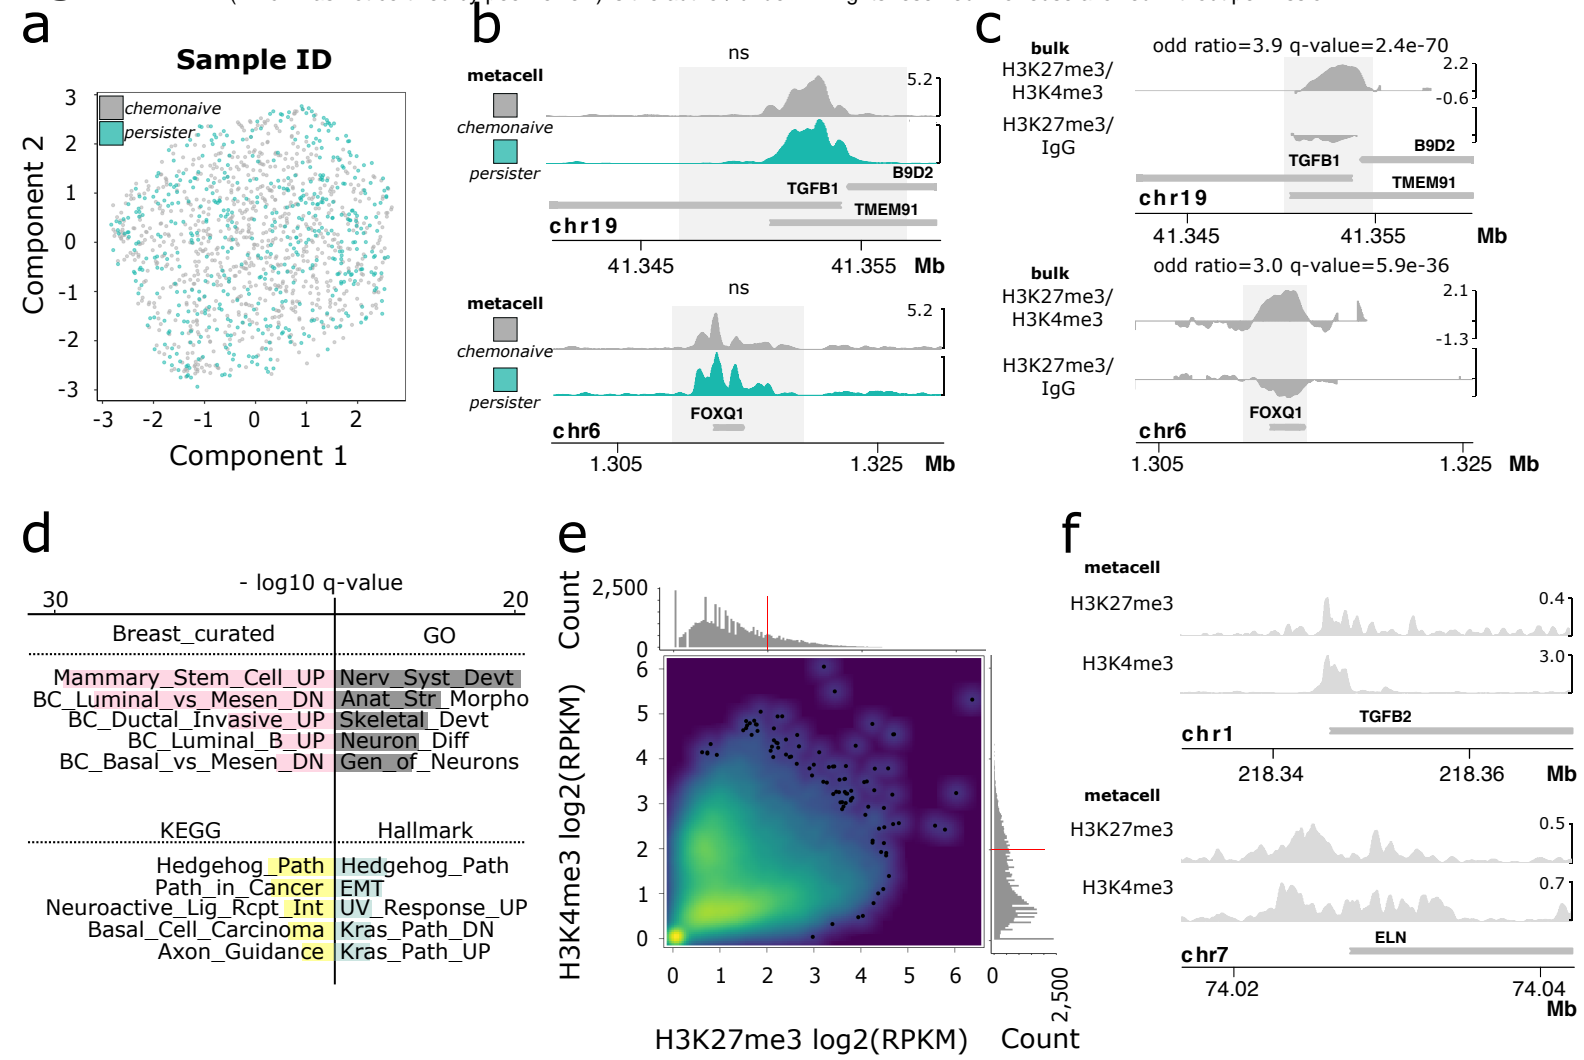

# Figure 4

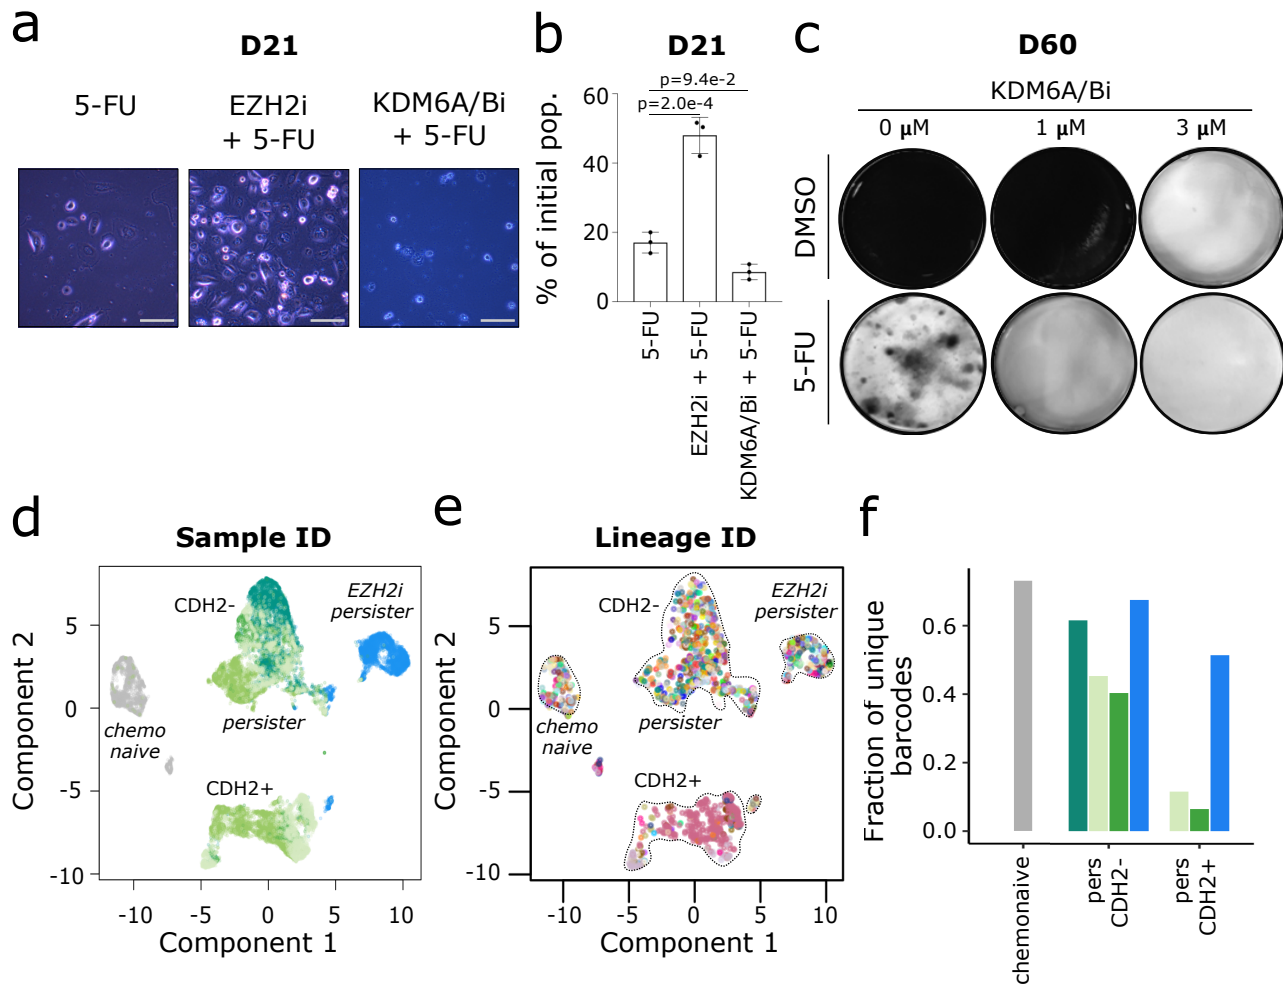

Source: https://www.biorxiv.org/content/10.1101/2021.01.04.423386v1.full.pdf
